# Supplementary material for: Viologen-modified electrodes for protection of hydrogenases from high potential inactivation while performing H2oxidation at low overpotential
Source: Royal Society of Chemistry journal article supplement (doi:10.1039/c8dt00955d), 2018-01-01
Supplement: c8dt00955d1.pdf [file c8dt00955d1.pdf]

**Supplementary Information for:** ‘Viologen-modified Electrodes for Protection of Hydrogenases from High Potential Inactivation while Performing H<sub>2</sub> Oxidation at Low Overpotential’ by Alaa A. Oughli, Marisela Vélez, James Birrell, Wolfgang Schuhmann, Wolfgang Lubitz, Nicolas Plumeré and Olaf Rüdiger

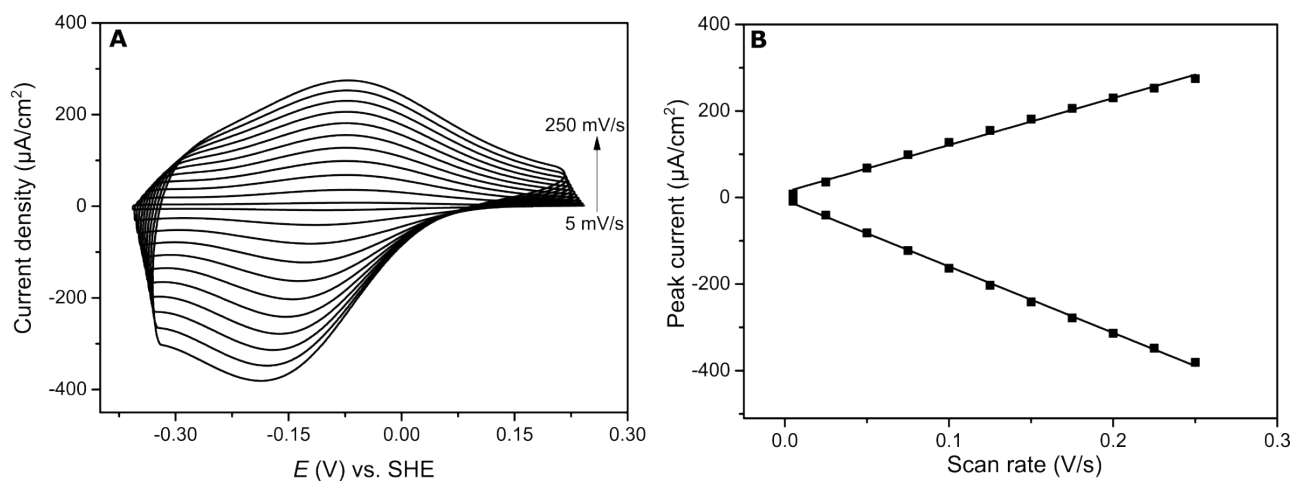

**Figure S1.** Electrode characterization. A) CVs of a gold electrode modified covalently with viologen with scan rates of 5, 25, 50, 75, 100, 150, 175, 200 and 250 mV s<sup>-1</sup>. B) Anodic and cathodic peak currents versus scan rate showing a linear response. Conditions: aqueous buffer pH 7, 25°C, N<sub>2</sub>.

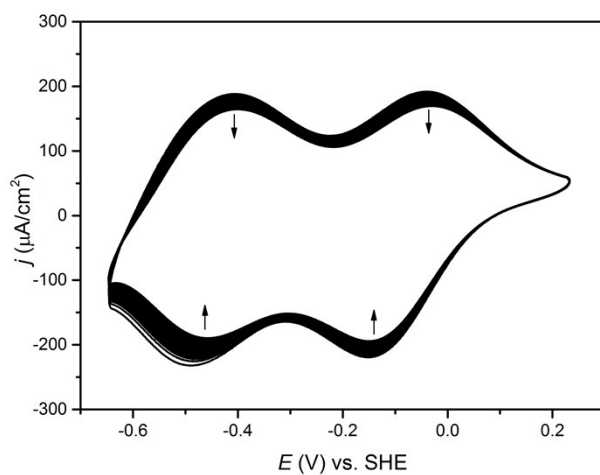

**Figure S2.** Viologen stability of the film at negative potentials. 100 consecutive CVs of a Ag electrode modified with a viologen film. Conditions: 25°C, aqueous buffer pH 7, N<sub>2</sub>, 0.1 V s<sup>-1</sup>.

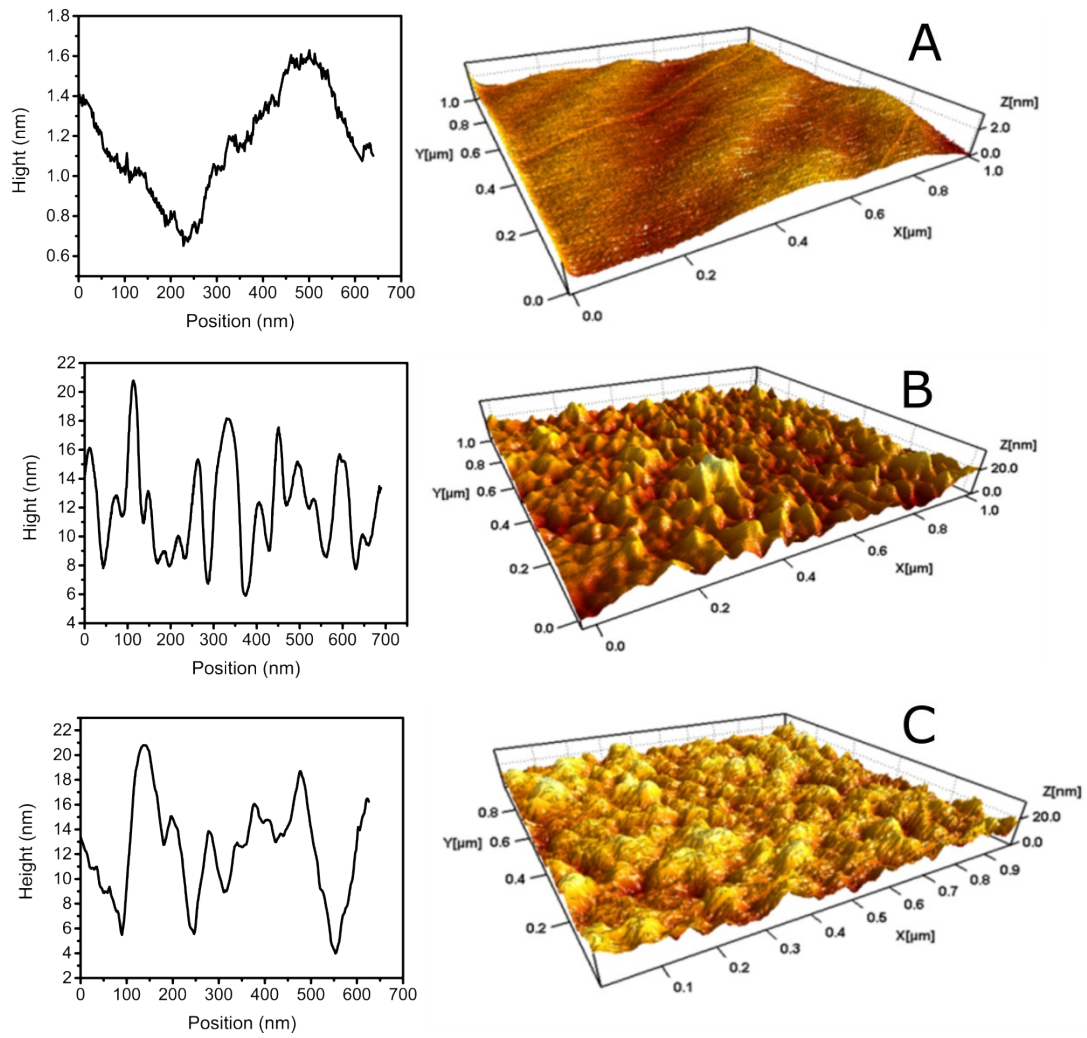

**Figure S3.** AFM topographic images, in 3D representation of a bare (A), viologen modified (B) and protein modified (C)  $1 \times 1 \mu\text{m}^2$  area of a Au-coated substrate. A line profile is shown on the left.

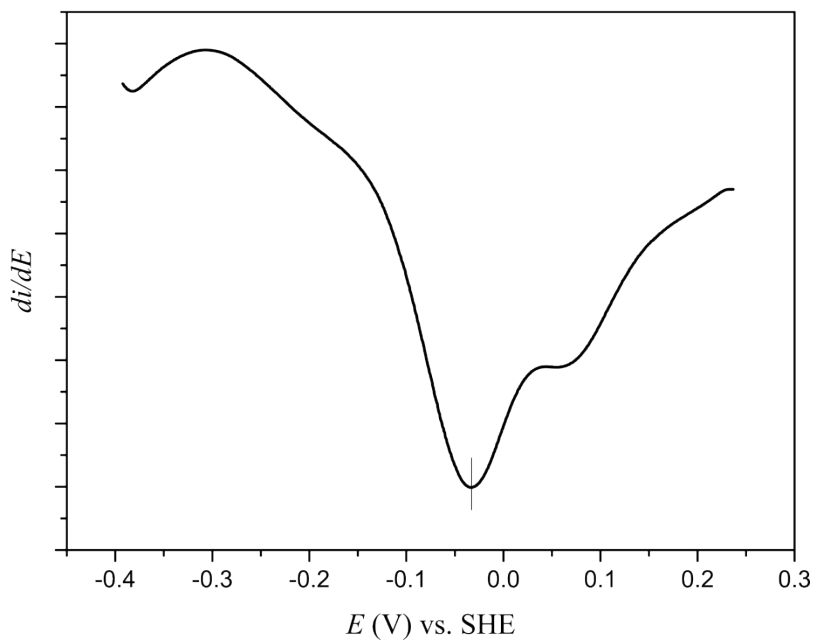

**Figure S4.** Determination of the  $E_{sw}$  using the derivative of the reversed scan of the CV of *DdHydAB* activity. The second more positive peak is attributed to another inactivation process, which is still currently under investigation.

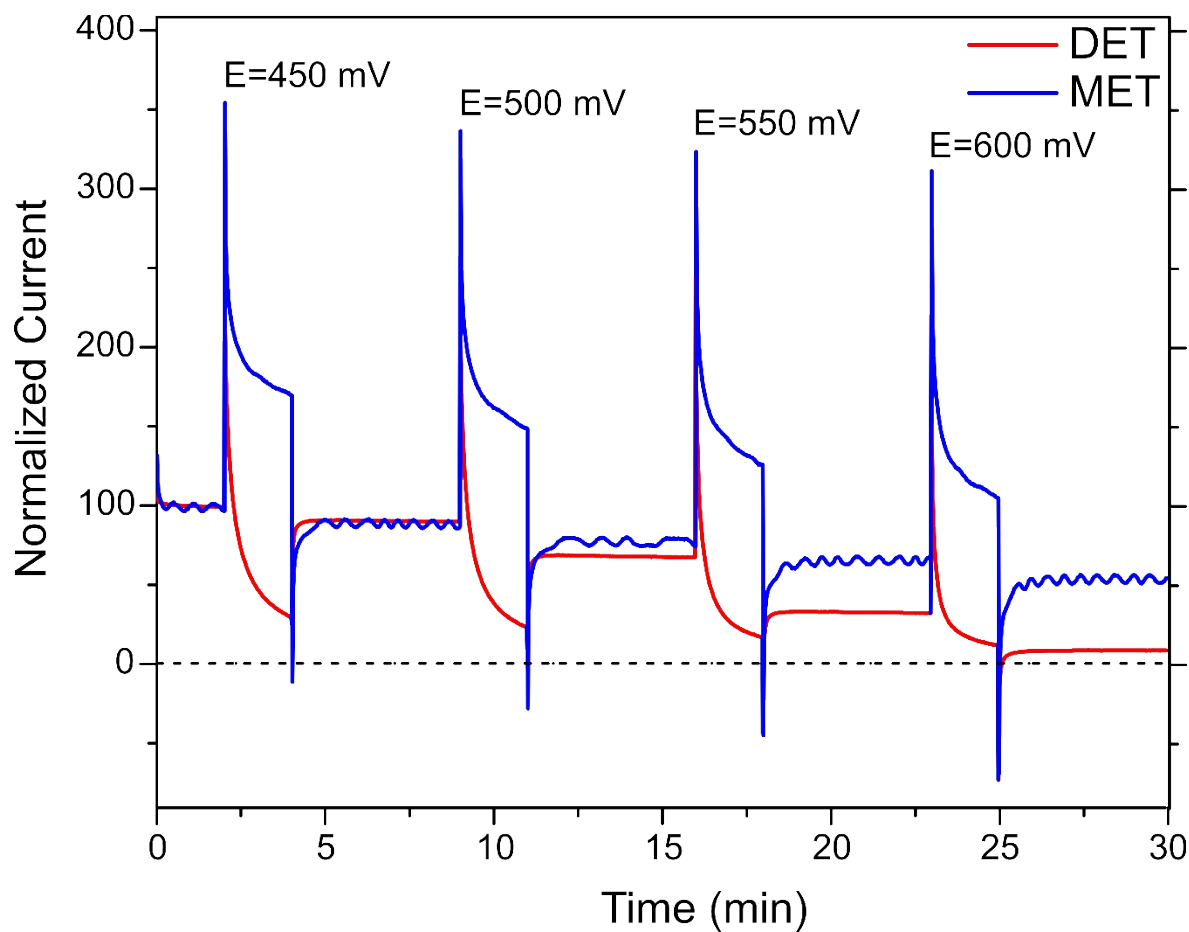

**Figure S5.** Chronoamperometry experiment of *DdHydAB* in DET mode on PGE (red) and on a viologen-modified GCE (blue). Potentials of 450, 500, 550, 600 mV vs. SHE were applied for 2 min each and a potential of -170 mV vs. SHE was applied for 5 min after each high potential to reactivate the enzyme. Conditions: 25°C, aqueous buffer pH 7, 1000 rpm, 100% H<sub>2</sub>.

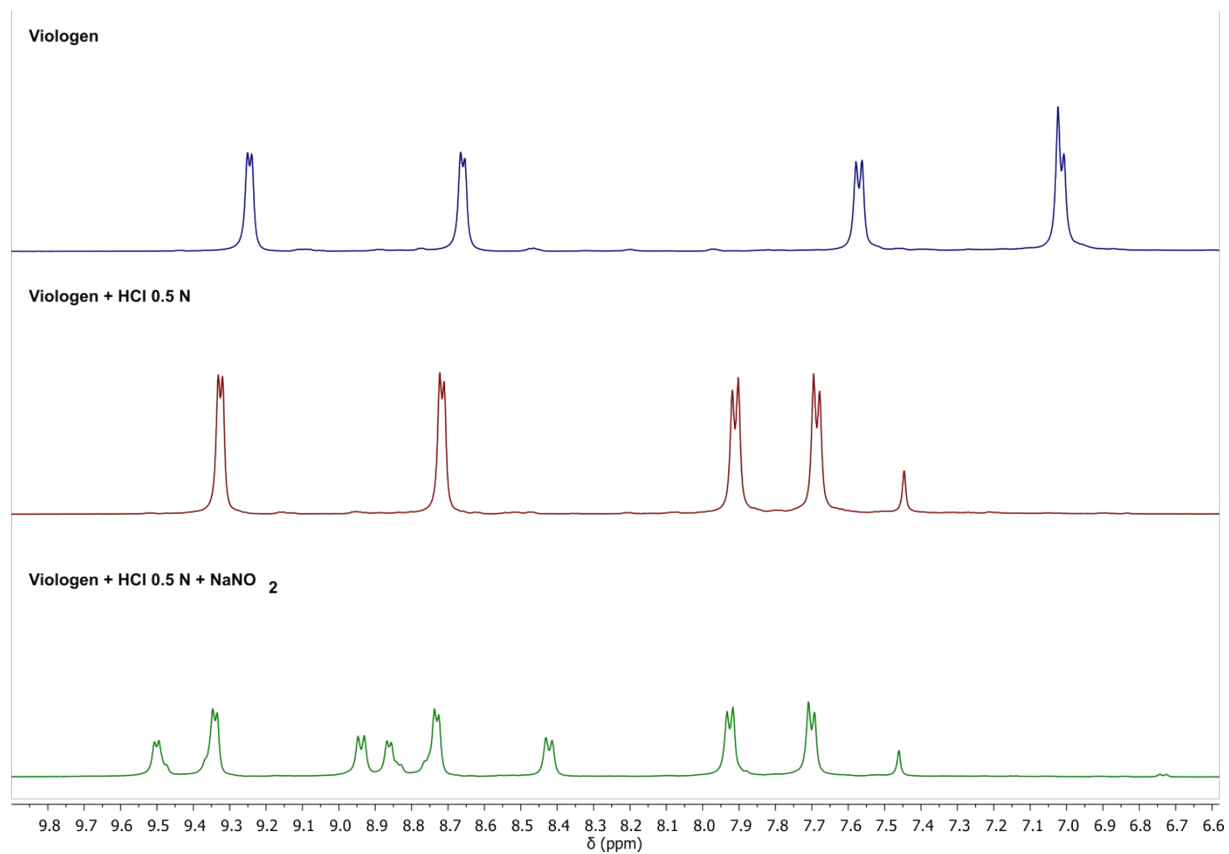

**Figure S6.** <sup>1</sup>H NMR spectra of the viologen derivative (**2**) in D<sub>2</sub>O (blue), in HCl 0.5 N solution in D<sub>2</sub>O (red) and with addition of NaNO<sub>2</sub> (green). The new peaks after NaNO<sub>2</sub> addition appear as a result of forming the diazonium salt of the viologen.
